# Supplementary material for: Trapping an Ester Hydrate Intermediate in a π-Stacked Macrocycle with Multiple Hydrogen Bonds
Source: MDPI journal article supplement (doi:10.3390/molecules28155705), 2023-07-28

## checkCIF/PLATON report

Structure factors have been supplied for datablock(s) w

THIS REPORT IS FOR GUIDANCE ONLY. IF USED AS PART OF A REVIEW PROCEDURE FOR PUBLICATION, IT SHOULD NOT REPLACE THE EXPERTISE OF AN EXPERIENCED CRYSTALLOGRAPHIC REFEREE.

No syntax errors found.      CIF dictionary      Interpreting this report

### Datablock: w

---

|                 |                                                                      |                                                                       |
|-----------------|----------------------------------------------------------------------|-----------------------------------------------------------------------|
| Bond precision: | C-C = 0.0083 A                                                       | Wavelength=0.71073                                                    |
| Cell:           | a=22.8534 (6)                                                        | b=22.8534 (6)      c=28.8133 (11)                                     |
|                 | alpha=90                                                             | beta=90      gamma=120                                                |
| Temperature:    | 200 K                                                                |                                                                       |
|                 | Calculated                                                           | Reported                                                              |
| Volume          | 13032.4 (8)                                                          | 13032.4 (8)                                                           |
| Space group     | R -3                                                                 | R -3                                                                  |
| Hall group      | -R 3                                                                 | -R 3                                                                  |
| Moiety formula  | 18(C24 H21 Cl Co N7), C2<br>O10 S2, 4(C H3 O4 S), 3(C<br>O), 36(C H4 | 3(C24 H21 Cl Co N7), 6(C H4<br>O), C0.667 H2 O2.667<br>S0.667, 2(Cl), |
| Sum formula     | C477 H534 Cl30 Co18 N126<br>O65.75 S6                                | C79.50 H50.92 Cl15 Co3 N21<br>O10.96 S                                |
| Mr              | 11400.93                                                             | 1861.76                                                               |
| Dx, g cm-3      | 1.453                                                                | 1.423                                                                 |
| Z               | 1                                                                    | 6                                                                     |
| Mu (mm-1)       | 0.814                                                                | 0.813                                                                 |
| F000            | 5896.0                                                               | 5668.0                                                                |
| F000'           | 5909.28                                                              |                                                                       |
| h, k, lmax      | 29, 29, 37                                                           | 29, 29, 37                                                            |
| Nref            | 6660                                                                 | 6657                                                                  |
| Tmin, Tmax      | 0.864, 0.907                                                         |                                                                       |
| Tmin'           | 0.850                                                                |                                                                       |

Correction method= Not given

Data completeness= 1.000

Theta(max)= 27.494

R(reflections)= 0.0708( 4323)

wR2(reflections)=  
0.2171( 6657)

S = 1.027

Npar= 432

The following ALERTS were generated. Each ALERT has the format

**test-name\_ALERT\_alert-type\_alert-level.**

Click on the hyperlinks for more details of the test.

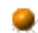

### Alert level B

PLAT043\_ALERT\_1\_B Calculated and Reported Mol. Weight Differ by .. 230.37 Check

**Author Response: Due to the disorder of solvent molecules and the compound crystallized in the highly symmetric space group, the hydrogen atoms of some solvent molecules are not identified, so the actual Molecular formula is different from the crystallographic Molecular formula.**

PLAT420\_ALERT\_2\_B D-H Bond Without Acceptor O1 --H1BB . Please Check

**Author Response: The oxygen atom of methanol (O1) acts as an imidazole group's hydrogen bond acceptor. In the structure, the hydrogen atom of methanol (H1BB) cannot find a suitable hydrogen bond acceptor.**

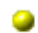

### Alert level C

PLAT041\_ALERT\_1\_C Calc. and Reported SumFormula Strings Differ Please Check  
PLAT068\_ALERT\_1\_C Reported F000 Differs from Calcd (or Missing)... Please Check  
PLAT234\_ALERT\_4\_C Large Hirshfeld Difference O6 --C0AA . 0.18 Ang.  
PLAT243\_ALERT\_4\_C High 'Solvent' Ueq as Compared to Neighbors of O1 Check  
PLAT260\_ALERT\_2\_C Large Average Ueq of Residue Including O0AA 0.211 Check  
PLAT260\_ALERT\_2\_C Large Average Ueq of Residue Including O1 0.101 Check  
PLAT260\_ALERT\_2\_C Large Average Ueq of Residue Including O2 0.146 Check  
PLAT260\_ALERT\_2\_C Large Average Ueq of Residue Including C14 0.123 Check  
PLAT260\_ALERT\_2\_C Large Average Ueq of Residue Including O1AA 0.159 Check  
PLAT341\_ALERT\_3\_C Low Bond Precision on C-C Bonds ..... 0.00833 Ang.  
PLAT906\_ALERT\_3\_C Large K Value in the Analysis of Variance ..... 2.737 Check  
PLAT975\_ALERT\_2\_C Check Calcd Resid. Dens. 0.63Ang From O1AA . 0.61 eA-3  
PLAT975\_ALERT\_2\_C Check Calcd Resid. Dens. 0.50Ang From C1AA . 0.49 eA-3  
PLAT976\_ALERT\_2\_C Check Calcd Resid. Dens. 0.83Ang From O1 . -0.47 eA-3  
PLAT976\_ALERT\_2\_C Check Calcd Resid. Dens. 0.83Ang From O1 . -0.47 eA-3  
PLAT976\_ALERT\_2\_C Check Calcd Resid. Dens. 0.82Ang From O1 . -0.42 eA-3

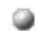

### Alert level G

FORMU01\_ALERT\_1\_G There is a discrepancy between the atom counts in the  
\_chemical\_formula\_sum and \_chemical\_formula\_moiety. This is  
usually due to the moiety formula being in the wrong format.  
Atom count from \_chemical\_formula\_sum: C79.5 H50.92 Cl5 Co3 N21 O10.  
Atom count from \_chemical\_formula\_moiety:C79 H89 Cl5 Co3 N21 O10.267 S  
FORMU01\_ALERT\_2\_G There is a discrepancy between the atom counts in the

\_chemical\_formula\_sum and the formula from the \_atom\_site\* data.  
 Atom count from \_chemical\_formula\_sum: C79.5 H50.92 Cl5 Co3 N21 O10.96  
 Atom count from the \_atom\_site data: C79.5 H89. Cl5. Co3 N21 O10.9582  
 CELLZ01\_ALERT\_1\_G Difference between formula and atom\_site contents detected.  
 CELLZ01\_ALERT\_1\_G ALERT: Large difference may be due to a  
 symmetry error - see SYMMG tests  
 From the CIF: \_cell\_formula\_units\_Z 6  
 From the CIF: \_chemical\_formula\_sum C79.50 H50.92 Cl5 Co3 N21 O10.96 S  
 TEST: Compare cell contents of formula and atom\_site data

| atom | Z*formula | cif sites | diff    |
|------|-----------|-----------|---------|
| C    | 477.00    | 477.00    | -0.00   |
| H    | 305.52    | 534.00    | -228.48 |
| Cl   | 30.00     | 30.00     | -0.00   |
| Co   | 18.00     | 18.00     | 0.00    |
| N    | 126.00    | 126.00    | 0.00    |
| O    | 65.76     | 65.75     | 0.01    |
| S    | 6.00      | 6.00      | 0.00    |

|                   |                                                  |        |        |
|-------------------|--------------------------------------------------|--------|--------|
| PLAT002_ALERT_2_G | Number of Distance or Angle Restraints on AtSite | 10     | Note   |
| PLAT003_ALERT_2_G | Number of Uiso or Uij Restrained non-H Atoms ... | 10     | Report |
| PLAT007_ALERT_5_G | Number of Unrefined Donor-H Atoms .....          | 6      | Report |
| PLAT045_ALERT_1_G | Calculated and Reported Z Differ by a Factor ... | 0.167  | Check  |
| PLAT072_ALERT_2_G | SHELXL First Parameter in WGHT Unusually Large   | 0.10   | Report |
| PLAT083_ALERT_2_G | SHELXL Second Parameter in WGHT Unusually Large  | 63.23  | Why ?  |
| PLAT172_ALERT_4_G | The CIF-Embedded .res File Contains DFIX Records | 11     | Report |
| PLAT178_ALERT_4_G | The CIF-Embedded .res File Contains SIMU Records | 4      | Report |
| PLAT186_ALERT_4_G | The CIF-Embedded .res File Contains ISOR Records | 3      | Report |
| PLAT188_ALERT_3_G | A Non-default SIMU Restraint Value has been used | 0.0010 | Report |
| PLAT188_ALERT_3_G | A Non-default SIMU Restraint Value has been used | 0.0100 | Report |
| PLAT188_ALERT_3_G | A Non-default SIMU Restraint Value has been used | 0.0100 | Report |
| PLAT188_ALERT_3_G | A Non-default SIMU Restraint Value has been used | 0.0010 | Report |
| PLAT300_ALERT_4_G | Atom Site Occupancy of S3 Constrained at         | 0.3333 | Check  |
| PLAT300_ALERT_4_G | Atom Site Occupancy of O3 Constrained at         | 0.2222 | Check  |
| PLAT300_ALERT_4_G | Atom Site Occupancy of O3AA Constrained at       | 0.1111 | Check  |
| PLAT300_ALERT_4_G | Atom Site Occupancy of O2AA Constrained at       | 0.2222 | Check  |
| PLAT300_ALERT_4_G | Atom Site Occupancy of C55 Constrained at        | 0.1111 | Check  |
| PLAT300_ALERT_4_G | Atom Site Occupancy of S2 Constrained at         | 0.6667 | Check  |
| PLAT300_ALERT_4_G | Atom Site Occupancy of O5 Constrained at         | 0.6667 | Check  |
| PLAT300_ALERT_4_G | Atom Site Occupancy of O6 Constrained at         | 0.6667 | Check  |
| PLAT300_ALERT_4_G | Atom Site Occupancy of C0AA Constrained at       | 0.6667 | Check  |
| PLAT300_ALERT_4_G | Atom Site Occupancy of H0AA Constrained at       | 0.6667 | Check  |
| PLAT300_ALERT_4_G | Atom Site Occupancy of O0AA Constrained at       | 0.5    | Check  |
| PLAT300_ALERT_4_G | Atom Site Occupancy of ClAA Constrained at       | 0.1667 | Check  |
| PLAT300_ALERT_4_G | Atom Site Occupancy of C27A Constrained at       | 0.5    | Check  |
| PLAT300_ALERT_4_G | Atom Site Occupancy of C27B Constrained at       | 0.5    | Check  |
| PLAT300_ALERT_4_G | Atom Site Occupancy of H1BB Constrained at       | 0.5    | Check  |
| PLAT300_ALERT_4_G | Atom Site Occupancy of H1AA Constrained at       | 0.5    | Check  |
| PLAT300_ALERT_4_G | Atom Site Occupancy of H27A Constrained at       | 0.5    | Check  |
| PLAT300_ALERT_4_G | Atom Site Occupancy of H27B Constrained at       | 0.5    | Check  |
| PLAT300_ALERT_4_G | Atom Site Occupancy of H27C Constrained at       | 0.5    | Check  |
| PLAT300_ALERT_4_G | Atom Site Occupancy of H27D Constrained at       | 0.5    | Check  |
| PLAT300_ALERT_4_G | Atom Site Occupancy of H27E Constrained at       | 0.5    | Check  |
| PLAT300_ALERT_4_G | Atom Site Occupancy of H27F Constrained at       | 0.5    | Check  |
| PLAT300_ALERT_4_G | Atom Site Occupancy of Cl4 Constrained at        | 0.6667 | Check  |
| PLAT300_ALERT_4_G | Atom Site Occupancy of O1AA Constrained at       | 0.25   | Check  |
| PLAT302_ALERT_4_G | Anion/Solvent/Minor-Residue Disorder (Resd 2 )   | 100%   | Note   |
| PLAT302_ALERT_4_G | Anion/Solvent/Minor-Residue Disorder (Resd 3 )   | 100%   | Note   |

|                   |                                                  |                        |              |
|-------------------|--------------------------------------------------|------------------------|--------------|
| PLAT302_ALERT_4_G | Anion/Solvent/Minor-Residue Disorder             | (Resd 4 )              | 100% Note    |
| PLAT302_ALERT_4_G | Anion/Solvent/Minor-Residue Disorder             | (Resd 5 )              | 50% Note     |
| PLAT302_ALERT_4_G | Anion/Solvent/Minor-Residue Disorder             | (Resd 7 )              | 100% Note    |
| PLAT302_ALERT_4_G | Anion/Solvent/Minor-Residue Disorder             | (Resd 8 )              | 100% Note    |
| PLAT304_ALERT_4_G | Non-Integer Number of Atoms in .....             | (Resd 2 )              | 4.67 Check   |
| PLAT304_ALERT_4_G | Non-Integer Number of Atoms in .....             | (Resd 7 )              | 0.67 Check   |
| PLAT304_ALERT_4_G | Non-Integer Number of Atoms in .....             | (Resd 8 )              | 0.04 Check   |
| PLAT311_ALERT_2_G | Isolated Disordered Oxygen Atom (No H's ?)       | .....                  | 00AA Check   |
| PLAT311_ALERT_2_G | Isolated Disordered Oxygen Atom (No H's ?)       | .....                  | 01AA Check   |
| PLAT315_ALERT_2_G | Singly Bonded Carbon Detected (H-atoms Missing). |                        | C55 Check    |
| PLAT398_ALERT_2_G | Deviating C-O-C Angle From 120 for O1            |                        | 55.9 Degree  |
| PLAT415_ALERT_2_G | Short Inter D-H..H-X                             | H5 ..H27A .            | 1.69 Ang.    |
|                   |                                                  | 1-x,1-y,1-z =          | 10_666 Check |
| PLAT415_ALERT_2_G | Short Inter D-H..H-X                             | H1AA ..H9 .            | 2.13 Ang.    |
|                   |                                                  | 1/3-x+y,2/3-x,-1/3+z = | 9_554 Check  |
| PLAT417_ALERT_2_G | Short Inter D-H..H-D                             | H1AA ..H5 .            | 2.08 Ang.    |
|                   |                                                  | 1-x,1-y,1-z =          | 10_666 Check |
| PLAT432_ALERT_2_G | Short Inter X...Y Contact                        | O1 ..C0AA .            | 2.60 Ang.    |
|                   |                                                  | 1-x,1-y,1-z =          | 10_666 Check |
| PLAT432_ALERT_2_G | Short Inter X...Y Contact                        | O1 ..C55 .             | 2.75 Ang.    |
|                   |                                                  | 1-x,1-y,1-z =          | 10_666 Check |
| PLAT432_ALERT_2_G | Short Inter X...Y Contact                        | N5 ..C27B .            | 2.82 Ang.    |
|                   |                                                  | 1-x,1-y,1-z =          | 10_666 Check |
| PLAT432_ALERT_2_G | Short Inter X...Y Contact                        | N7 ..C55 .             | 2.91 Ang.    |
|                   |                                                  | 2/3+x-y,1/3+x,4/3-z =  | 15_556 Check |
| PLAT432_ALERT_2_G | Short Inter X...Y Contact                        | C9 ..C55 .             | 2.26 Ang.    |
|                   |                                                  | 2/3+x-y,1/3+x,4/3-z =  | 15_556 Check |
| PLAT432_ALERT_2_G | Short Inter X...Y Contact                        | C10 ..C55 .            | 2.77 Ang.    |
|                   |                                                  | 2/3+x-y,1/3+x,4/3-z =  | 15_556 Check |
| PLAT720_ALERT_4_G | Number of Unusual/Non-Standard Labels .....      |                        | 9 Note       |
| PLAT779_ALERT_4_G | Suspect or Irrelevant (Bond) Angle(s) in CIF ... |                        | 36.20 Deg.   |
|                   | O3AA -S3 -O3 3_565 1_555 1_555 .....             | #                      | 147 Check    |
| PLAT779_ALERT_4_G | Suspect or Irrelevant (Bond) Angle(s) in CIF ... |                        | 36.20 Deg.   |
|                   | O3AA -S3 -O3 2_665 1_555 3_565 .....             | #                      | 150 Check    |
| PLAT789_ALERT_4_G | Atoms with Negative _atom_site_disorder_group #  |                        | 1 Check      |
| PLAT794_ALERT_5_G | Tentative Bond Valency for Co1 (II)              |                        | 1.89 Info    |
| PLAT822_ALERT_4_G | CIF-embedded .res Contains Negative PART Numbers |                        | 1 Check      |
| PLAT860_ALERT_3_G | Number of Least-Squares Restraints .....         |                        | 71 Note      |
| PLAT883_ALERT_1_G | No Info/Value for _atom_sites_solution_primary . |                        | Please Do !  |
| PLAT910_ALERT_3_G | Missing # of FCF Reflection(s) Below Theta(Min). |                        | 4 Note       |
| PLAT933_ALERT_2_G | Number of HKL-OMIT Records in Embedded .res File |                        | 2 Note       |
| PLAT978_ALERT_2_G | Number C-C Bonds with Positive Residual Density. |                        | 3 Info       |

---

0 **ALERT level A** = Most likely a serious problem - resolve or explain  
 2 **ALERT level B** = A potentially serious problem, consider carefully  
 16 **ALERT level C** = Check. Ensure it is not caused by an omission or oversight  
 74 **ALERT level G** = General information/check it is not something unexpected

8 ALERT type 1 CIF construction/syntax error, inconsistent or missing data  
 31 ALERT type 2 Indicator that the structure model may be wrong or deficient  
 8 ALERT type 3 Indicator that the structure quality may be low  
 43 ALERT type 4 Improvement, methodology, query or suggestion  
 2 ALERT type 5 Informative message, check

---

It is advisable to attempt to resolve as many as possible of the alerts in all categories. Often the minor alerts point to easily fixed oversights, errors and omissions in your CIF or refinement strategy, so attention to these fine details can be worthwhile. In order to resolve some of the more serious problems it may be necessary to carry out additional measurements or structure refinements. However, the purpose of your study may justify the reported deviations and the more serious of these should normally be commented upon in the discussion or experimental section of a paper or in the "special\_details" fields of the CIF. checkCIF was carefully designed to identify outliers and unusual parameters, but every test has its limitations and alerts that are not important in a particular case may appear. Conversely, the absence of alerts does not guarantee there are no aspects of the results needing attention. It is up to the individual to critically assess their own results and, if necessary, seek expert advice.

### **Publication of your CIF in IUCr journals**

A basic structural check has been run on your CIF. These basic checks will be run on all CIFs submitted for publication in IUCr journals (*Acta Crystallographica*, *Journal of Applied Crystallography*, *Journal of Synchrotron Radiation*); however, if you intend to submit to *Acta Crystallographica Section C* or *E* or *IUCrData*, you should make sure that full publication checks are run on the final version of your CIF prior to submission.

### **Publication of your CIF in other journals**

Please refer to the *Notes for Authors* of the relevant journal for any special instructions relating to CIF submission.

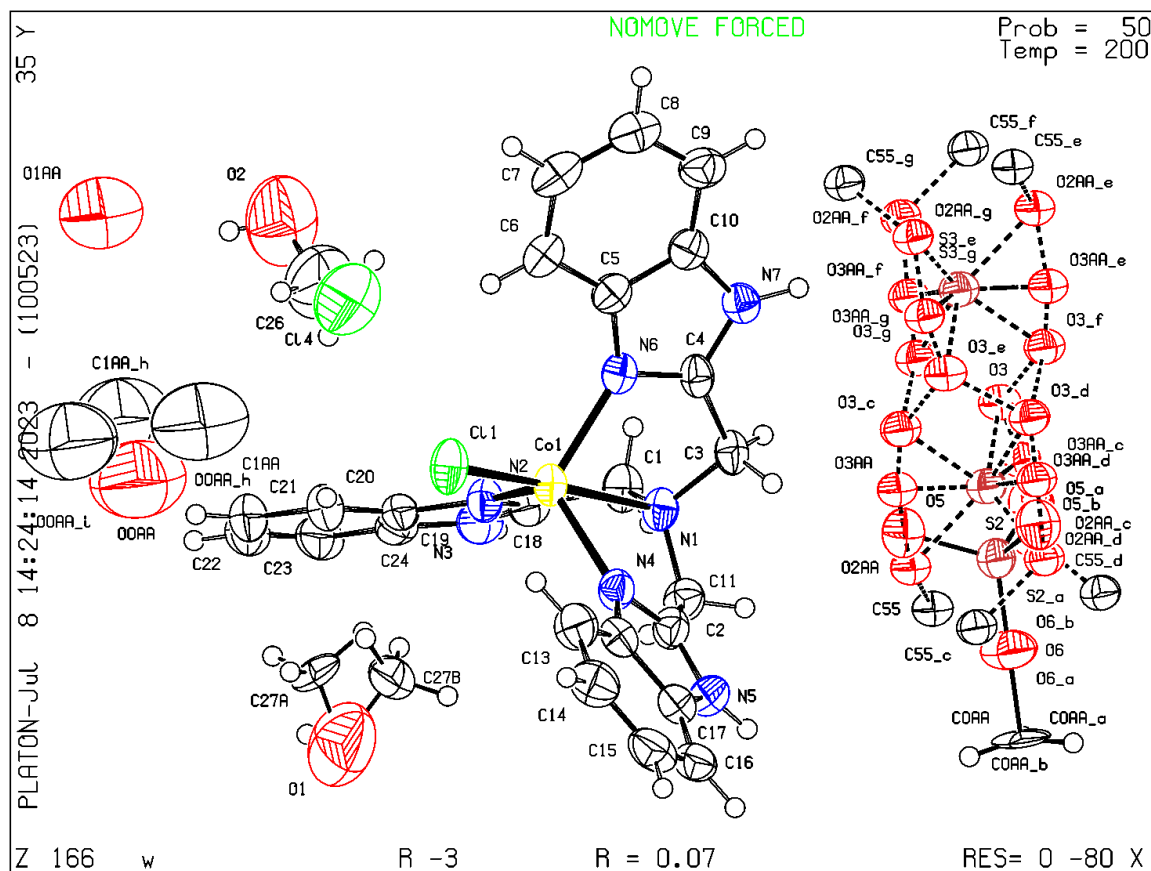

Supplement: s1 [file s1]
